# Supplementary material
Source: PubMed Central journal article supplement (PMC3030191)
Supplement: NIHMS214343-supplement-01.pdf [file NIHMS214343-supplement-01.pdf]

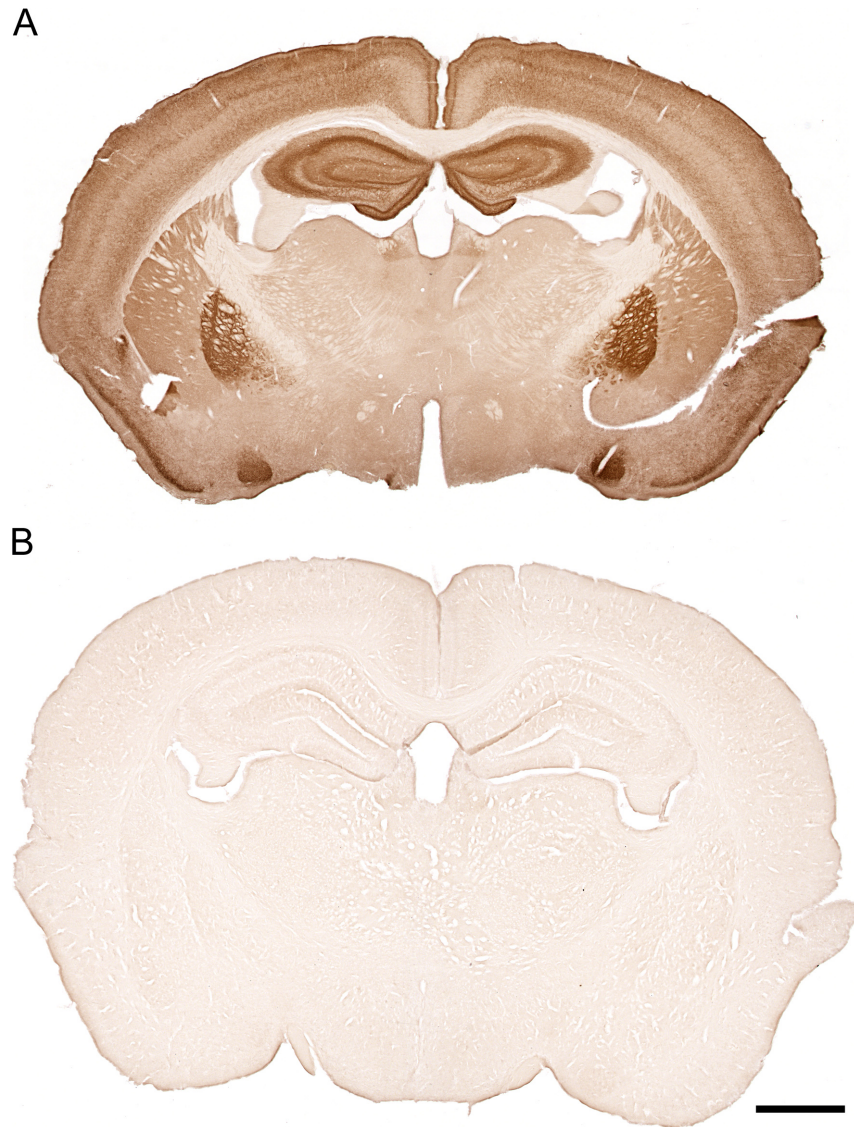

**Supplementary Figure S1.** CB1R immunoreactivity in wild-type (A) and CB1R knockout (B) mice. The structures labeled and the distribution pattern of CB1R immunoreactivity in the wild-type mouse was identical to those previously reported in rodent (A). CB1R immunoreactivity was completely absent in the CB1R knockout mouse (B) confirming the specificity of the CB1R antibody. Scale bar = 1 mm applies to all panels.

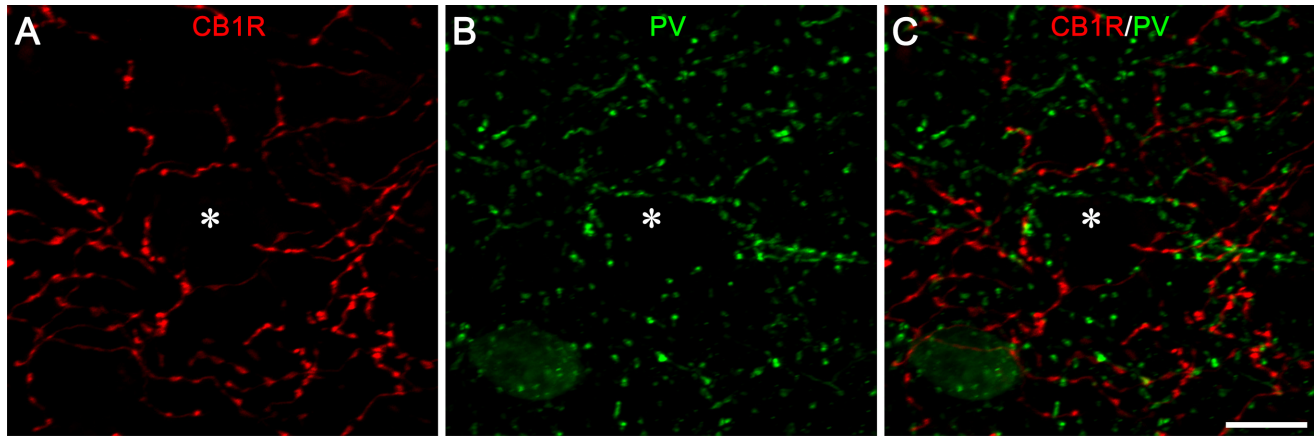

**Supplementary Figure S2.** Fluorescent photomicrographs of CB1R and PV immunoreactivity in area 46 of monkey DLPFC. (A) CB1-IR axons labeled with Alexa 633 (red). (B) PV-IR neuron and axons labeled with Alexa 488 (green). (C) Overlay of panels A and B showing an absence of colocalization of CB1R and PV immunoreactivity. Asterisk denotes an unlabeled pyramidal cell body receiving single-labeled CB1R- and PV-IR perisomatic appositions. Scale bar = 10  $\mu$ m applies to all panels.

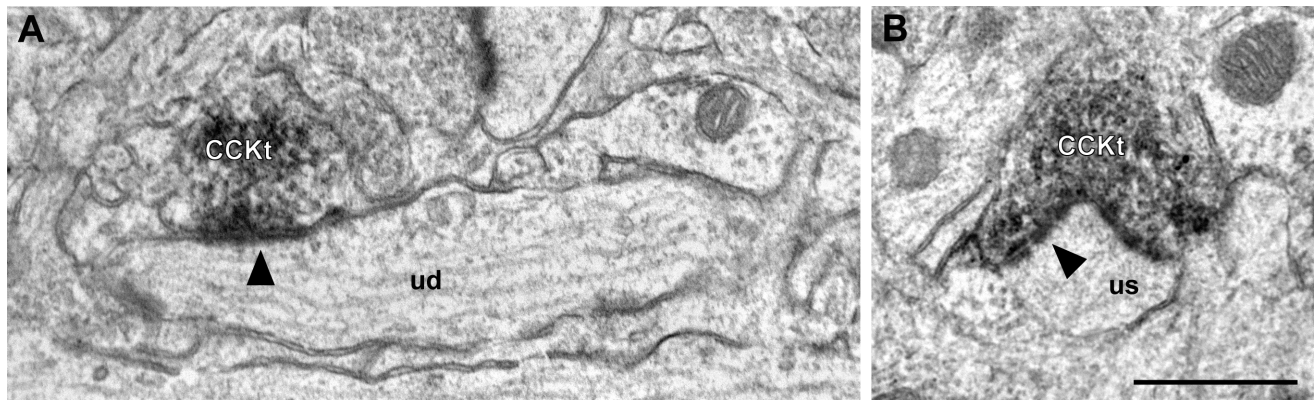

**Supplementary Figure S3.** Electron micrographs of CCK-IR axon terminals forming asymmetric synapses in area 46 of monkey DLPFC. (A) A CCK-IR axon terminal (CCKt) forms an asymmetric synapse (arrowhead) onto an unlabeled dendritic shaft (ud). (B) A CCKt forms an asymmetric synapse (arrowhead) onto an unlabeled dendritic spine (us). Scale bar = 500 nm and applies to all panels.
